# Supplementary material for: Ultrasensitive detection of multiple Alzheimer's disease biomarkers by SERS-LFA
Source: Royal Society of Chemistry journal article supplement (doi:10.1039/d2an00717g), 2022-01-01
Supplement: d2an00717g1.pdf [file d2an00717g1.pdf]

## Supporting Information

# Ultrasensitive Detection of Multiple Alzheimer's Disease Biomarkers by SERS-LFA

Yuanbao Zhan<sup>a, b, c</sup>, Ruihua Fei<sup>a, b, c</sup>, Yu Lu<sup>a, b, c</sup>, Yu Wan<sup>a, d</sup>, Xuming Wu<sup>e</sup>, Jian Dong<sup>a, c</sup>, Dianhuai Meng<sup>f</sup>, Qinyu Ge<sup>\*, a, c</sup>, and Xiangwei Zhao<sup>\*, a, b, c</sup>

<sup>a</sup> State Key Laboratory of Bioelectronics, School of Biological Science and Medical Engineering, Southeast University, Nanjing 210096, China

<sup>b</sup> Institute of Biomaterials and Medical Devices, Southeast University, Suzhou 215163, China

<sup>c</sup> Southeast University Shenzhen Research Institute, Shenzhen 518000, China

<sup>d</sup> Jiangsu Simcere Pharmaceutical Co., Ltd, Nanjing 210042, China

<sup>e</sup> Nantong Fourth People's Hospital, Jiangsu 226005, China

<sup>f</sup> Rehabilitation Medical Center, The First Affiliated Hospital of Nanjing Medical University, Nanjing, 210029, China

\* Corresponding author. E-mail address: [geqinyu@seu.edu.cn](mailto:geqinyu@seu.edu.cn) (Qinyu Ge), [xwzhao@seu.edu.cn](mailto:xwzhao@seu.edu.cn) (Xiangwei Zhao).

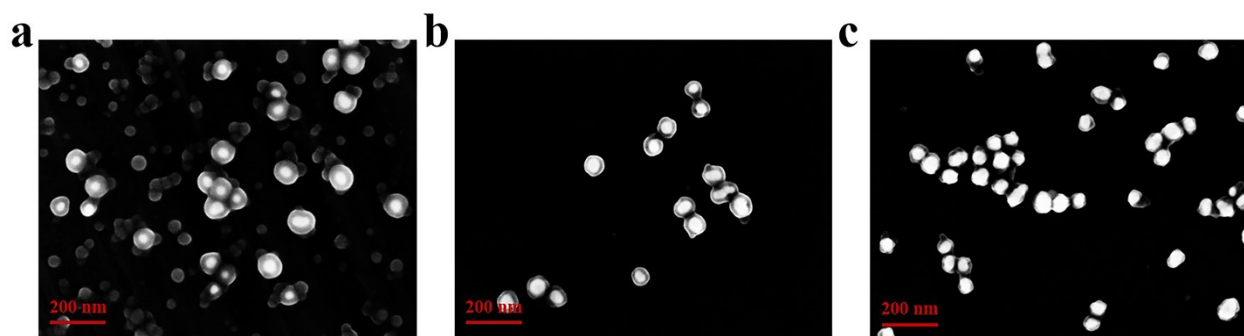

**Fig. S1** SEM image of Au@SiO<sub>2</sub> SERS nanotags. (a) Au@SiO<sub>2</sub> SERS nanotags synthesized by adding 8 mL of TEOS. (b) Au@SiO<sub>2</sub> SERS nanotags synthesized by adding 5 mL of TEOS. (c) Au@SiO<sub>2</sub> SERS nanotags synthesized by adding 2 mL of TEOS.

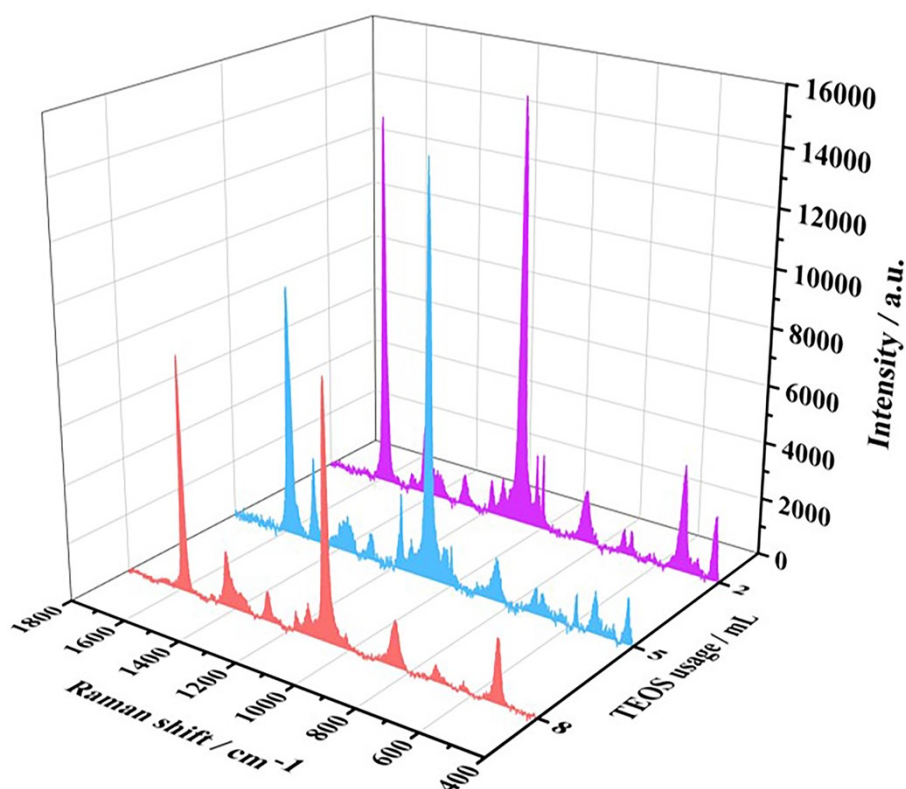

**Fig. S2** SERS spectra of Au@SiO<sub>2</sub> SERS nanotags synthesized with different TEOS dosages.

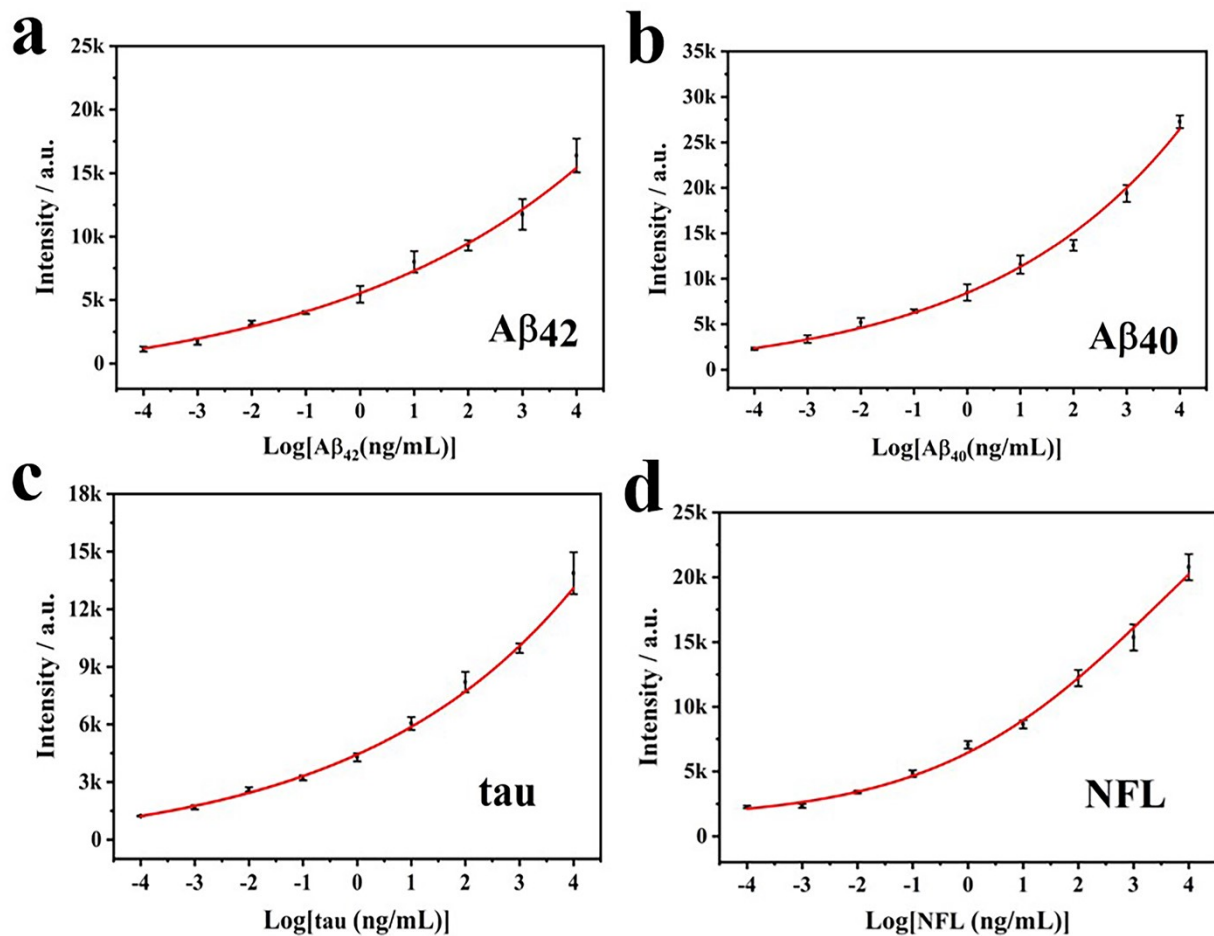

**Fig. S3** Dose-response curves of four AD biomarkers. (a)  $A\beta_{42}$  (drawn with the Raman intensities at  $1079\text{ cm}^{-1}$  on the  $T_1$  line). (b)  $A\beta_{40}$  (drawn with the Raman intensities at  $1330\text{ cm}^{-1}$  on the  $T_1$  line). (c) tau (drawn with the Raman intensities at  $1079\text{ cm}^{-1}$  on the  $T_2$  line). (d) NFL (drawn with the Raman intensities at  $1330\text{ cm}^{-1}$  on the  $T_2$  line).
